# Supplementary material
Source: publisher site journal article supplement (https://www.dovepress.com/article/450447)
Supplement: Supplementary file 1 [file get_supplementary_file.php]

Supplemental Material

**Table S1 The identification and rate of each component of treatment failure.**

| Patients who had either of the following six condition after glucocorticoids treatment were considered as treatment failure: | Identification | Rate |
| --- | --- | --- |
| a) received invasive or non-invasive MV during the index hospitalization | Invasive or non-invasive MV records beyond 48 hours after admission in Hospital Information System | 1.8% (59/3254) |
| b) transferred to ICU during the index hospitalization | ICU transfer records beyond 48 hours after admission in Hospital Information System | 2.6% (85/3254) |
| c) LOS longer than 14 days during the index hospitalization | The time duration between admission data and discharge date recorded in Hospital Information System longer than 14 days | 18.6% (604/3254) |
| d) died during the index hospitalization | Death records beyond 48 hours after admission in Hospital Information System | 1.0% (32/3254) |
| e) died for any cause within 30 days after discharge | Death records within 30 days after discharge in hospital discharge database, which covers discharge records from all secondary- and tertiary-level hospitals in Beijing | 0.2% (5/3254) |
| f) readmitted for AECOPD within 30 days after discharge | Hospitalization with a primary diagnosis of AECOPD within 30 days after discharge in hospital discharge database, which covers discharge records from all secondary- and tertiary-level hospitals in Beijing | 5.7% (184/3254) |
| **Abbreviations:** MV, mechanical ventilation; ICU, intensive care unit; LOS, length of stay; AECOPD, acute exacerbations of chronic obstructive pulmonary disease. | | |

**Table S2 The area under the curve of single biomarkers that positively predict treatment failure.**

| **Variable(s)** | **AUC (95% CI)** | **Cut-off value** | **Sensitivity (%)** | **Specificity (%)** | **Youden’s Index** |
| --- | --- | --- | --- | --- | --- |
| WBC, 10^9/L | 0.530 (0.502-0.558) | 8.08 | 34.4% | 73.0% | 0.074 |
| Eosinophils, 10^9/L | 0.573 (0.548-0.598) | 0.2 | 77.9% | 29.8% | 0.078 |
| Eosinophils, % | 0.575 (0.550-0.600) | 2 | 62.6% | 49.2% | 0.118 |
| Lymphocytes, 10^9/L | 0.594 (0.569-0.619) | 0.25 | 57.5% | 56.2% | 0.137 |
| Lymphocytes, % | 0.600 (0.575-0.625) | 21.8 | 58.8% | 56.4% | 0.152 |
| Neutrophils, 10^9/L | 0.561 (0.534-0.589) | 5.56 | 38.3% | 72.3% | 0.106 |
| Neutrophils, % | 0.598 (0.571-0.626) | 69.9 | 53.2% | 63.0% | 0.162 |
| Platelets, 10^9/L | 0.530 (0.506-0.555) | 193 | 47.7% | 59.2% | 0.069 |
| RDW | 0.520 (0.496-0.544) | 11.1 | 42.7% | 61.4% | 0.040 |
| NLR | 0.603 (0.576-0.631) | 3.39 | 54.3% | 61.5% | 0.158 |
| PLR | 0.563 (0.535-0.591) | 170.2 | 44.8% | 66.2% | 0.110 |
| CRP, mmol/L | 0.588 (0.560-0.615) | 1.88 | 38.4% | 76.0% | 0.144 |
| TC, mmol/L | 0.530 (0.504-0.556) | 42 | 7.6% | 95.4% | 0.030 |
| LDL-C, mmol/L | 0.535 (0.509-0.560) | 1.6 | 19.9% | 86.3% | 0.062 |
| Alb, g/L | 0.556 (0.530-0.581) | 31.9 | 29.0% | 80.7% | 0.100 |
| PALB, g/L | 0.572 (0.546-0.597) | 0.19 | 63.6% | 48.2% | 0.118 |
| PNI | 0.584 (0.558-0.609) | 42 | 51.0% | 62.2% | 0.132 |

**Abbreviations:** AUC, area under the receiver operating curve; WBC, white blood cells; RDW, red cell distribution width; NLR, neutrophil to lymphocyte ratio; PLR, platelet to lymphocyte ratio; CRP, C-reactive protein; TC, total cholesterol; LDL-C, low-density lipoprotein cholesterol; Alb, albumin; PALB, prealbumin; PNI, prognostic nutritional index.

**Table S3 The univariate analyses of predicting factors for corticosteroid treatment failure among patients hospitalized for AECOPD.**

| **Variables** | **N (%)** | **Treatment failure rate(%)** | **Crude OR（95%CI）** | **P-value** |
| --- | --- | --- | --- | --- |
|
| Smoking status |  |  |  |  |
| Never smoker | 863 (27.9) | 27.2 | Reference |  |
| Current smoker | 732 (23.7) | 18.3 | 0.60 (0.47,0.76) | <0.001 |
| Former smoker | 1500 (48.5) | 26.0 | 0.94 (0.78,1.14) | 0.514 |
| Missing | 159 (4.9) | 28.3 | 1.06 (0.72,1.54) | 0.177 |
| Hospitalization for AECOPD in the previous year | | | |  |
| No | 2648 (81.5) | 22.9 | Reference |  |
| Yes | 602 (18.5) | 33.1 | 1.67 (1.78,2.02) | <0.001 |
| Comorbidities |  |  |  |  |
| Hypertension |  |  |  |  |
| No | 1831 (56.3) | 23.3 | Reference |  |
| Yes | 1423 (43.7) | 26.5 | 1.19 (1.01,1.39) | 0.038 |
| Diabetes mellitus |  |  |  |  |
| No | 2750 (84.5) | 24.1 | Reference |  |
| Yes | 504 (15.5) | 28.0 | 1.22 (0.99,1.51) | 0.065 |
| Ischaemic heart diseases |  |  |  |  |
| No | 2479 (76.2) | 23.2 | Reference |  |
| Yes | 775 (23.8) | 29.6 | 1.39 (1.16,1.66) | <0.001 |
| Cerebrovascular disease |  |  |  |  |
| No | 2956 (90.8) | 24.4 | Reference |  |
| Yes | 298 (9.2) | 27.9 | 1.20 (0.92,1.56) | 0.187 |
| Chronic kidney disease |  |  |  |  |
| No | 3104 (95.4) | 23.9 | Reference |  |
| Yes | 150 (4.6) | 40.7 | 2.18 (1.56,3.05) | <0.001 |
| Chronic hepatic insufficiency | | |  |  |
| No | 3115 (95.7) | 23.9 | Reference |  |
| Yes | 139 (4.3) | 42.5 | 2.35 (1.66,3.32) | <0.001 |
| Laboratory examination after hospitalization | | | | |
| Eosinophils |  |  |  |  |
| < 200 cells/μL and < 2% | 1565 (48.1) | 29.2 | 1.66 (1.41,1.97) | <0.001 |
| ≥ 200 cells/μL or ≥ 2% | 1464 (45.0) | 19.9 | Reference |  |
| Missing | 225 (6.9) | 24.9 | 1.34 (0.96,1.86) | <0.001 |
| Neutrophils (%) |  |  |  |  |
| < 69.9 | 1785 (54.9) | 19.6 | Reference |  |
| ≥ 69.9 | 1242 (38.2) | 32.0 | 1.93 (1.64,2.29) | <0.001 |
| Missing | 227 (7.0) | 25.6 | 1.41 (1.03,1.95) | 0.035 |
| NLR |  |  |  |  |
| < 3.39 | 1748 (53.7) | 19.6 | Reference |  |
| ≥ 3.39 | 1280 (39.3) | 31.6 | 1.90 (1.61,2.24) | <0.001 |
| Missing | 226 (7.0) | 25.7 | 1.42 (1.03,1.96) | 0.033 |
| Platelets (10^9/L) |  |  |  |  |
| < 193 | 1270 (39.0) | 27.5 | 1.29 (1.10,1.53) | 0.003 |
| ≥ 193 | 1760 (54.1) | 22.7 | Reference |  |
| Missing | 224 (6.9) | 25.0 | 1.14 (0.82,1.57) | 0.435 |
| RDW |  |  |  |  |
| < 11.1 | 1891 (15.1) | 23.6 | Reference |  |
| ≥ 11.1 | 1106 (34.0) | 26.3 | 1.15 (0.97,1.37) | 0.101 |
| Missing | 257 (7.9) | 25.7 | 1.12 (0.83,1.51) | 0.471 |
| CRP (mg/L) |  |  |  |  |
| < 1.88 | 1847 (56.8) | 20.3 | Reference |  |
| ≥ 1.88 | 698 (21.5) | 33.4 | 1.97 (1.63,2.40) | <0.001 |
| Missing | 709 (21.8) | 27.8 | 1.52 (1.24,1.85) | <0.001 |
| LDL-C (umol/L) |  |  |  |  |
| < 1.6 | 392 (12.1) | 32.2 | Reference |  |
| ≥ 1.6 | 2402 (73.8) | 23.0 | 0.63 (0.50,0.79) | <0.001 |
| Missing | 460 (14.1) | 27.4 | 0.80 (0.59,1.07) | 0.130 |
| Alb (g/L) |  |  |  |  |
| < 31.9 | 2275 (69.9) | 22.6 | Reference |  |
| ≥ 31.9 | 614 (18.9) | 32.7 | 1.67 (1.37,2.03) | <0.001 |
| Missing | 365 (11.2) | 24.4 | 1.11 (0.85,1.43) | 0.450 |
| PALB (g/L) |  |  |  |  |
| < 0.19 | 1437 (44.2) | 20.4 | Reference |  |
| ≥ 0.19 | 1399 (43.0) | 28.9 | 1.59 (1.33,1.88) | <0.001 |
| Missing | 418 (12.9) | 25.6 | 1.34 (1.04,1.73) | 0.023 |
| PNI |  |  |  |  |
| < 42 | 1161 (35.7) | 30.9 | 1.71 (1.44,2.03) | <0.001 |
| ≥ 42 | 1692 (52.0) | 20.7 | Reference |  |
| Missing | 401 (12.3) | 23.4 | 1.17 (0.90,1.52) | 0.236 |
| In-hospital SCS treatment |  |  |  |  |
| No | 2127 (65.4) | 18.2 | Reference |  |
| Yes | 1127 (34.6) | 37.1 | 2.66 (2.26,3.13) | <0.001 |

**Abbreviations:** AECOPD, acute exacerbations of chronic obstructive pulmonary disease; NLR, neutrophil to lymphocyte ratio; RDW, red cell distribution width; CRP, C-reactive protein; LDL-C, low-density lipoprotein cholesterol; Alb, albumin; PALB, prealbumin; PNI, prognostic nutritional index; SCS, systematic corticosteroid; OR, odds ratio; CI, confidence interval.

**Table S4 The predicting factors and corresponding AUC for systemic corticosteroid treatment failure among patients with AECOPD with a smoking history (N=766).**

|  | Predicting factors* | AUC | *P* for improvement# | |
| --- | --- | --- | --- | --- |
| from Model 1 | from Model 2 |
| Model 1 | Hospitalization for AECOPD in the previous year + comorbidities | 0.587 (0.548,0.627) | - | - |
| Model 2 | Model 1 + Eos | 0.598 (0.557,0.640) | 0.337 | - |
| Model 3 | Model 1 + PLA | 0.618 (0.570,0.640) | 0.045 | 0.413 |
| Model 4 | Model 1 + CRP | 0.617 (0.576,0.658) | 0.009 | 0.229 |
| Model 5 | Model 2 + PNI | 0.609 (0.567,0.651) | 0.082 | 0.440 |
| Model 6 | Model 1 + LDL-C | 0.592 (0.551,0.634) | 0.512 | 0.647 |
| Model 7 | Model 1 + Eos + PLA + CRP + LDL-C + PNI | 0.644 (0.603,0.685) | 0.002 | 0.012 |

**Notes:** *, Predicting factors in the models: hospitalization for AECOPD in the previous year (yes, no); comorbidities (ischemic heart diseases, chronic hepatic insufficiency). Eos, eosinophils <200 cells/μL and <2%; PLA, platelets <193 10^9/L; CRP, C-reactive protein ≥1.88 mg/L; PNI, prognostic nutritional index < 42; LDL-C, low-density lipoprotein cholesterol <1.6 umol/L. #, DeLong's test for two correlated ROC curves.

**Abbreviations:** AECOPD, acute exacerbations of chronic obstructive pulmonary disease; AUC, area under the receiver operating curve.

**Table S5 The predicting factors and corresponding AUC for systemic corticosteroid treatment failure among patients with AECOPD without a smoking history (N=292).**

|  | Predicting factors* | AUC | *P* for improvement# | |
| --- | --- | --- | --- | --- |
| from Model 1 | from Model 2 |
| Model 1 | Comorbidities | 0.564 (0.510,0.617) | - | - |
| Model 2 | Model 1 + Eos | 0.584 (0.520,0.648) | 0.283 | - |
| Model 3 | Model 1 + CRP | 0.655 (0.593,0.718) | 0.004 | 0.048 |
| Model 4 | Model 2 + PNI | 0.627 (0.564,0.691) | 0.049 | 0.278 |
| Model 5 | Model 1 + CRP + PNI | 0.679 (0.617,0.742) | <0.001 | 0.014 |

**Notes:** *, Predicting factors in the models: comorbidities (ischemic heart diseases, chronic hepatic insufficiency); Eos, eosinophils <200 cells/μL and <2%; CRP, C-reactive protein ≥1.88 mg/L; PNI, prognostic nutritional index < 42. #, DeLong's test for two correlated ROC curves.

**Abbreviations:** AECOPD, acute exacerbations of chronic obstructive pulmonary disease; AUC, area under the receiver operating curve.
